# Supplementary material for: Rationally designed hierarchical C/TiO2/Ti multilayer core–sheath wires for high-performance energy storage devices
Source: Royal Society of Chemistry journal article supplement (doi:10.1039/d1nr00814e), 2021-01-01
Supplement: d1nr00814e1.pdf [file d1nr00814e1.pdf]

**Supporting Information**

**Rationally designed Hierarchical C/TiO<sub>2</sub>/Ti  
multilayer Core-sheath Wires for High-performance  
Energy Storage Devices**

*Wei Cao, Yun Gong, Wenhao Wang, Mingzhou Chen, Junhe Yang, Yuhua Xue\**

-----  
Mr W. Cao, Y. Gong, W.H. Wang, M.Z. Chen, Prof. J.H. Yang, Prof. Y.H. Xue,

School of Materials Science and Engineering

University of Shanghai for Science and Technology

516 Jungong Road, Shanghai 200093.

Email: xueyuhua@usst.edu.cn

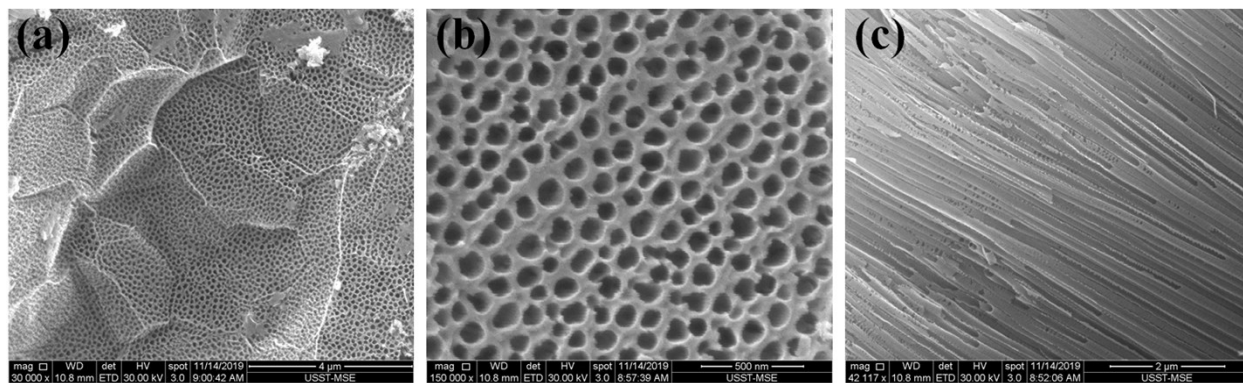

Figure S1. (a,b) Top-view and (c) side view SEM images of TiO<sub>2</sub>/Ti core-sheath wire.

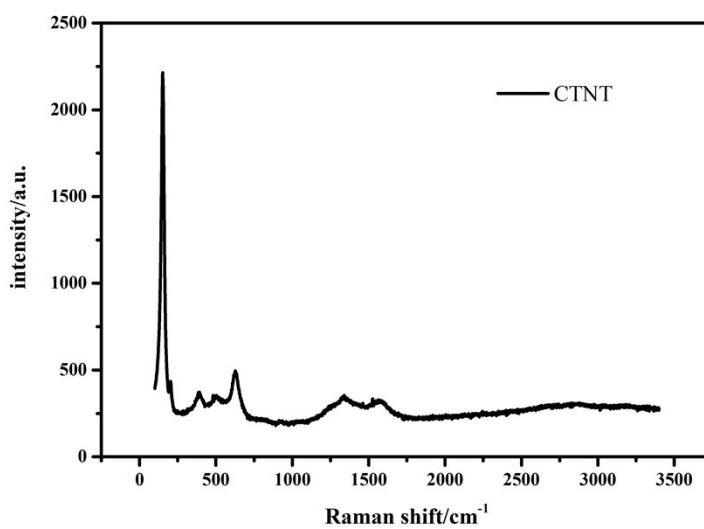

Figure S2. Raman spectrum of CTNT.

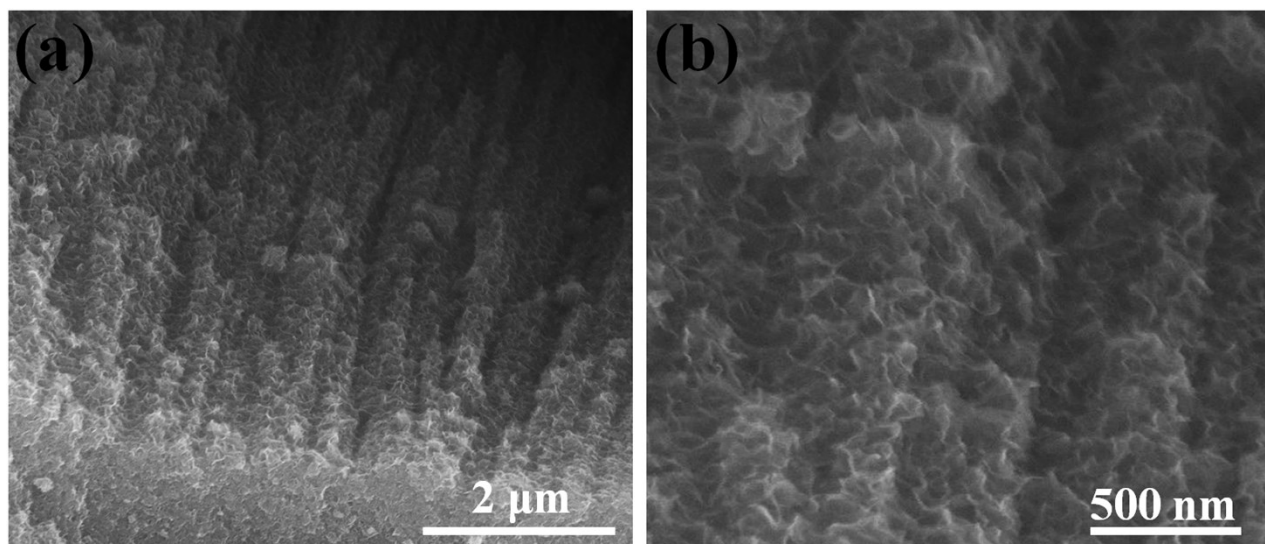

Figure S3. Side view SEM image of MoS<sub>2</sub>@CTNT core-sheath wire.

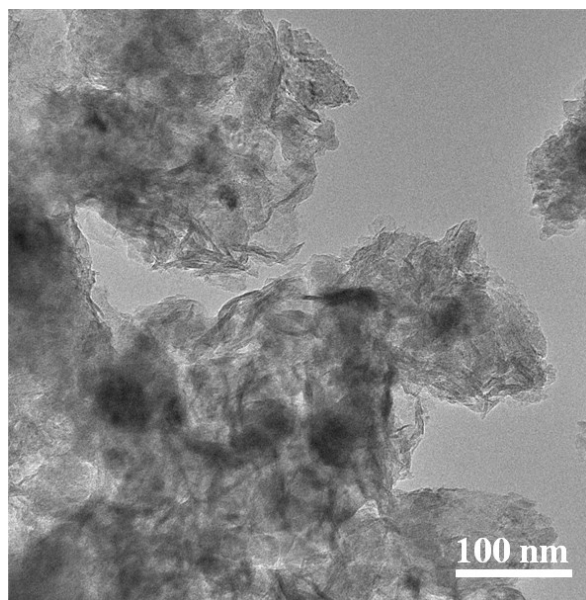

Figure S4. TME image of MoS<sub>2</sub> from MoS<sub>2</sub>@CTNT core-sheath wire

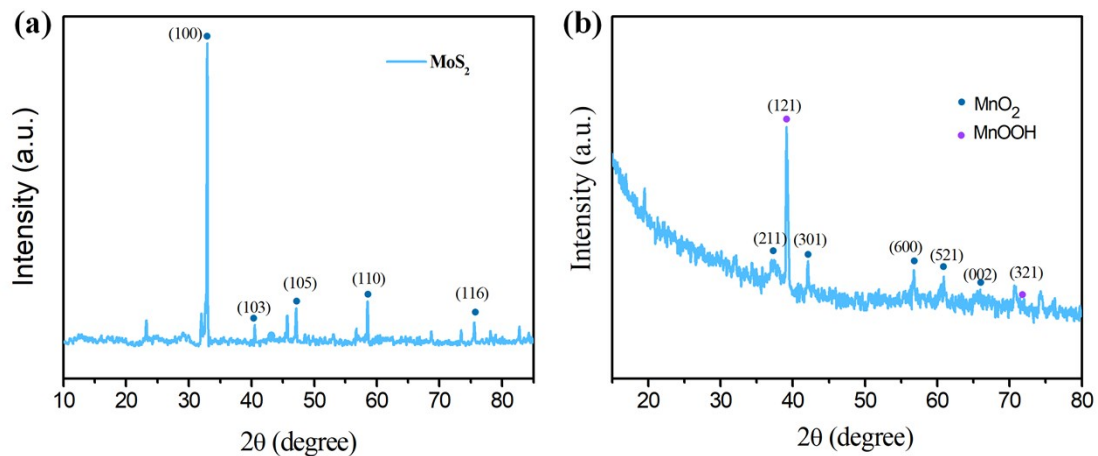

Figure S5. XRD patterns of (a)  $\text{MoS}_2$ @CTNT (b)  $\text{MnO}_2$ @CTNT

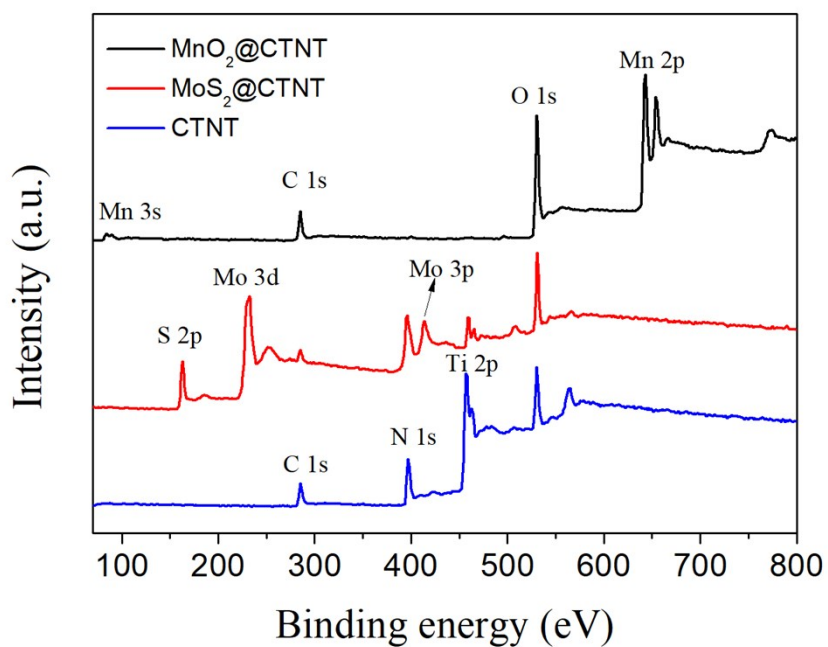

Figure S6. The survey XPS spectra of CTNT,  $\text{MoS}_2$ @CTNT,  $\text{MnO}_2$ @CTNT.
